# Supplementary material for: Intellectual disability health content within medical curriculum: an audit of what our future doctors are taught
Source: PubMed Central journal article supplement (PMC4827238; doi:10.1186/s12909-016-0625-1), 2016-04-11
Supplement: 12909_2016_625_MOESM1_ESM.pdf [file 12909_2016_625_MOESM1_ESM.pdf]

**Additional file 1.** Phase 1: Interview Schedule- relating to the overall structure of the course

- 1) What is the name of your University?
- 2) What is your current position within the University?
- 3) What is the name of the medical degree offered by your university?
- 4) Is this degree graduate entry level or undergraduate?
- 5) What is the duration of the degree for a full-time student (in years)?
- 6) How many students graduated from the degree in the last academic year?
- 7) Approximately what percentage of students' time during the degree involves direct patient contact?
- 8) In total, how many subjects/units of study (including both non-clinical and clinical units) are provided as part of this degree?
- 9) Of the total subjects/units of study in the degree:
  - a. How many are compulsory subjects/units of study?
  - b. How many are elective subjects/units of study?
    - i. Of the elective subjects/units of study do any of them have an intellectual disability component?
    - ii. If yes, approximately what proportion of students choose this intellectual disability component?
- 10) How many subjects/units of study (including both non-clinical and clinical units) in this degree contain at least some formal teaching content in intellectual disability physical health and/or intellectual disability mental health?
- 11) How many staff within the medical school:
  - a. Specialise in the area of intellectual disability physical health and/or intellectual disability mental health?
  - b. Have a demonstrated interest in the area of intellectual disability physical health and/or intellectual disability mental health?
  - c. Currently provide teaching within the curriculum specifically in the area of intellectual disability physical health and/or intellectual disability mental health?
